# Supplementary material for: Profiling the estimated plasma concentrations of 215 marketed oral drugs
Source: Royal Society of Chemistry journal article supplement (doi:10.1039/c5md00583c), 2016-01-01
Supplement: c5md00583c3.odt [file c5md00583c3.odt]

In Silico ADME Models
This document describes the building of the following in silico ADME models:
Lipophilicity (log P)
Human oral bioavailability (F)
Human volume of distribution (steady state) (V)
Human in vivo clearance (Cl)
Human Caco-2 permeability (Papp, Caco2, pH 7.4)
Human plasma protein binding (fu)
Aqueous solubility at pH 7.4 (solubility7.4)
Each model was built following a similar process and the key technical details are summarised in Table 1. 

Table 1  Summary of technical details associated to the building of seven in silico ADME models.
Model
log P
F
V
Cl
Papp, Caco2, pH 7.4
fu
solubility7.4
Experimental units
-
%
Lkg-1
mLmin-1kg-1
cms-1
% bound
M
Number of unrefined measurements from ChEMBL
1653
658
1293
1489
600
2403
2506
Number of associated SMILES strings needing desalting
7
2
11
12
29
6
0
Number of results removed as the associated compound contained P
6
10
27
39
6
16
0
Number of results removed as the associated compound contained B
0
0
1
1
0
5
0
Number of results removed as the associated compound contained Si
0
0
0
0
0
2
0
Number of results removed as the associated compound was charged
2
5
24
36
2
1 (incorrectly charged)
6
Number of results removed as the associated compound was inorganic
0
0
1
1
0
0
0
Number of results removed as the associated compound was a dimer
0
0
2
3
0
0
0
Data transformation for modelling
-
log10(F / 100)
log10(V)
log10(Cl)
log10(Papp, Caco2, pH 7.4)
log10((1 – fu) / fu)
log10(solubility7.4)
Number of unique compounds with an experimentally derived value
1525
519
659
667
542
2103
2498
Compounds removed for associated measurement's having standard deviation >0.4
7
4
3
1
7
19
0
Compounds removed for containing sugar functional groups
8
15
34
26
5
21
0
Compounds removed for having steroid based structures
11
21
27
26
12
21
7
Compounds removed for having macrocyclic based structures
4
12
36
28
36
21
0
Compounds removed for having 8-fused ring system structures
0
0
2
2
0
0
0
Compounds removed for containing ≥4 SO3H groups
0
0
2
2
0
1
0
Compounds removed for containing a long aliphatic chain (C ≥13)
0
1
1
1
0
0
0
Compounds removed for being predominantly peptide based
0
0
2
0
0
0
0
Compounds removed for having a molecular weight >850 Da
0
0
1
7
0
0
1
Compounds removed for having an incorrect structure
41
0
2
4
4
9
9
Other compounds removed for structural reasons
0
1 (tretinoin)
0
0
1 (osmitrol)
0
0
Model's lower dynamic range
-6.0
-1.5
-1.3
-1.5
-7.0
-1.0
-7.0
Model's upper dynamic range
8.0
0.0
2.0
1.5
-3.5
3.3
-2.5
Compounds removed for having a measurement < lower dynamic range
4
7
1
1
27
16
7
Compounds removed for having a measurement > upper dynamic range
6
0
3
7
0
1
0
Size of the model's data set
1444
458
545
562
450
1944
2474
Training set size
1156
412
464
477
405
1596
1980
External test set size
288
46
81
85
45
398
494
External test set data range restriction
-
≥-1.0*
-
≥-1.0†
-
-
-
Machine learning methods used
SVM
SVM, RF, PLS
SVM, RF
SVM, RF, PLS
SVM, RF, PLS
SVM, RF, PLS
SVM, RF, PLS
SVM: gamma
2-11
2-7
2-9
2-7
2-7
2-9
2-7
SVM: cost
32
2
2
2
8
8
2
RF: number of trees
-
100
150
150
100
500
500
Model predictive lower dynamic range (on its original scale)
-6
10*
0.05
0.1†
1.00 x 10-7
10.00
1.00 x 10-7
Model predictive upper dynamic range (on its original scale)
8
100
100.00
31.6
3.16 x 10-4
99.95
3.16 x 10-3
Data
Unrefined chemical and experimental data sets was sourced from the ChEMBL database (version 20, January 2015, https://www.ebi.ac.uk/chembl/) using data reported in specific publications (see Reference section below). Extracted SMILES strings were checked for salts and desalted where necessary. Results associated with compounds containing P, B, Si, an overall charge, or being inorganic or dimeric were removed. Where necessary the experimental data was transformed to normalise it. Repeat measurements for compounds were averaged and those with a standard deviation >0.4 removed. Compounds that contained a sugar group, were steroid or macrocyclic based or had an 8-fused ring system were removed. Compounds that contained ≥4 sulphonic acid groups, a long aliphatic chain (C ≥13), were predominantly peptide based, had a molecular weight >850 Da or had incorrect SMILES strings were removed. Any additional compounds removed for structural reasons are specified in Table 1. Compounds with measurements less than or greater than the specified lower and upper dynamic ranges of the in silico ADME model were also removed. The subsequent refined data sets were randomly split into training and external test sets as specified in Table 1.
Descriptors
RDKit descriptors (http://www.rdkit.org) calculated from a molecule's smiles string.
Modelling
Performed within R (http://www.R-project.org/) with the use of additional R libraries: 
e1071 library (http://CRAN.R-project.org/package=e1071) for support vector machine (SVM) modelling.
random forest (RF) library (http://CRAN.R-project.org/package=randomForest).
partial least squares (PLS) library (http://CRAN.R-project.org/package=pls).
Zero variance and collinear properties were removed prior to modelling. SVM models were tuned on gamma and cost settings using a k-fold cross validation method, see Table 1 for their details. RF models used different settings for the number of trees, see Table 1 for their details. Generic SVM settings: method = eps-regression, kernel = radial, epsilon = 0.1, nu = 0.01, coefficient0 = 0, degree = 3, folds = 5. Generic RF settings: method = regression, mtry = 12. Generic PLS settings: fit method = kernelpls, number of components = 5, cross-validation: 5 random segments.
Model regression lines
The x-axis refers to the observed experimental data and the y-axis refers to the in silico ADME model predicted data, both on the transformed data scale, see Table 1 for details.
log P
Training set: y = 0.97x + 0.09, r2: 0.98, RMSE: 0.32
Test set: y = 0.96x + 0.10, r2: 0.97, RMSEP: 0.44
F
Training set: y = 0.62x + 0.10, r2: 0.83, RMSE: 0.12
Test set: y = 0.35x – 0.18, r2: 0.38, RMSEP: 0.19
V
Training set: y = 0.74x, r2: 0.89, RMSE: 0.22
Test set: y = 0.63x + 0.01, r2: 0.66, RMSEP: 0.34
Cl
Training set: y = 0.52x + 0.28, r2: 0.84, RMSE: 0.32
Test set: y = 0.44x + 0.29, r2: 0.55, RMSEP: 0.40
Papp, Caco2, pH 7.4
Training set: y = 0.69x – 1.65, r2: 0.89, RMSE: 0.30
Test set: y = 0.45x – 2.87, r2: 0.50, RMSEP: 0.53
fu
Training set: y = 0.64x + 0.45, r2: 0.84, RMSE: 0.37
Test set: y = 0.49x + 0.61, r2: 0.60, RMSEP: 0.57
solubility7.4
Training set: y = 0.75x - 1.15, r2: 0.90, RMSE: 0.34
Test set: y = 0.42x - 2.65, r2: 0.48, RMSEP: 0.69
Additional software used
Python (v2.7) (http://www.python.org/), along with PANDAS (http://pandas.pydata.org/), Rpy2 (http://rpy.sourceforge.net/) and NumPy (http://www.numpy.org/) python libraries.

References
J. Med. Chem. 1977, 20, 53-58. 
J. Med. Chem. 1977, 20, 1071-1081. 
J. Med. Chem. 1980, 23, 1095-1101. 
J. Med. Chem. 1984, 27, 1493-1502. 
J. Med. Chem. 1991, 34, 786-797. 
J. Med. Chem. 1996, 39, 3394-3400. 
J. Med. Chem. 1998, 41, 602-617. 
J. Med. Chem. 2001, 44, 1927-1937. 
J. Med. Chem. 2002, 45, 2867-2876. 
Bioorg. Med. Chem. Lett. 2004, 14, 4411-4415. 
J. Med. Chem. 2004, 47, 1242-1250. 
J. Med. Chem. 2004, 47, 1242-1250. 
J. Med. Chem. 2005, 48, 604-613. 
J. Pharm. Sci. 2005, 94, 1467-1483. 
Bioorg. Med. Chem. Lett. 2006, 16, 2224-2228. 
Drug Metab. Dispos. 2006, 34, 1255-1265. 
J. Med. Chem. 2006, 49, 2953-2968. 
Antimicrob. Agents Chemother. 2007, 51, 3659-3671. 
Bioorg. Med. Chem. 2007, 15, 3756-3767. 
Bioorg. Med. Chem. 2007, 15, 7738-7745. 
Drug Metab. Dispos. 2007, 35, 1435-1445. 
J. Med. Chem. 2007, 50, 742-748. 
Bioorg. Med. Chem. 2008, 16, 5606-5618. 
Bioorg. Med. Chem. Lett. 2008, 18, 3421-3426. 
Bioorg. Med. Chem. Lett. 2008, 18, 5299-5302. 
Drug Metab. Dispos. 2008, 36, 1385-1405. 
Drug Metab. Dispos. 2008, 36, 1385-1405. 
Eur. J. Med. Chem. 2008, 43, 714-740. 
Bioorg. Med. Chem. Lett. 2009, 19, 462-468. 
Bioorg. Med. Chem. Lett. 2009, 19, 6404-6412. 
Eur. J. Med. Chem. 2009, 44, 4455-4460. 
Eur. J. Med. Chem. 2009, 44, 4455-4460. 
J. Med. Chem. 2009, 52, 2571-2586. 
J. Med. Chem. 2009, 52, 4844-4852. 
ACS Med. Chem. Lett. 2010, 1, 460-465. 
Bioorg. Med. Chem. Lett. 2010, 20, 1388-1394. 
Bioorg. Med. Chem. Lett. 2010, 20, 5559-5566. 
J. Med. Chem. 2010, 53, 822-839. 
J. Med. Chem. 2010, 53, 897-910. 
J. Med. Chem. 2010, 53, 1098-1108. 
J. Med. Chem. 2010, 53, 2010-2037. 
J. Med. Chem. 2010, 53, 3227-3246. 
J. Med. Chem. 2010, 53, 3566-3584. 
J. Med. Chem. 2010, 53, 5165-5178. 
J. Med. Chem. 2010, 53, 6003-6017. 
J. Med. Chem. 2010, 53, 6243-6274. 
J. Med. Chem. 2010, 53, 7076-7094. 
Bioorg. Med. Chem. 2011, 19, 2615-2624. 
Bioorg. Med. Chem. Lett. 2011, 21, 3301-3306. 
Bioorg. Med. Chem. Lett. 2011, 21, 3676-3681. 
Bioorg. Med. Chem. Lett. 2011, 21, 7440-7446. 
J. Med. Chem. 2011, 54, 3426-3435. 
J. Med. Chem. 2011, 54, 4399-4426. 
J. Med. Chem. 2011, 54, 5070-5081. 
J. Med. Chem. 2011, 54, 7084-7093. 
J. Med. Chem. 2011, 54, 7299-7317. 
Bioorg. Med. Chem. 2012, 20, 851-858. 
Bioorg. Med. Chem. Lett. 2012, 22, 90-95. 
Bioorg. Med. Chem. Lett. 2012, 22, 613-618. 
Bioorg. Med. Chem. Lett. 2012, 22, 901-906. 
Bioorg. Med. Chem. Lett. 2012, 22, 1464-1468. 
Bioorg. Med. Chem. Lett. 2012, 22, 1550-1556. 
Bioorg. Med. Chem. Lett. 2012, 22, 2033-2042. 
Bioorg. Med. Chem. Lett. 2012, 22, 2811-2817. 
Bioorg. Med. Chem. Lett. 2012, 22, 5108-5113. 
Bioorg. Med. Chem. Lett. 2012, 22, 6756-6761. 
J. Med. Chem. 2012, 55, 414-423. 
J. Med. Chem. 2012, 55, 2945-2959. 
J. Med. Chem. 2012, 55, 4640-4651. 
J. Med. Chem. 2012, 55, 5188-5219. 
J. Med. Chem. 2012, 55, 5951-5964. 
J. Med. Chem. 2012, 55, 6523-6540. 
J. Med. Chem. 2012, 55, 10136-10147. 
J. Med. Chem. 2012, 55, 10652-10661. 
Bioorg. Med. Chem. Lett. 2013, 23, 3967-3975. 
Bioorg. Med. Chem. Lett. 2013, 23, 6248-6253. 
Eur. J. Med. Chem. 2013, 70, 831-845. 
J. Med. Chem. 2013, 56, 220-240. 
J. Med. Chem. 2013, 56, 568-583. 
J. Med. Chem. 2013, 56, 1677-1692. 
J. Med. Chem. 2013, 56, 1878-1893. 
J. Med. Chem. 2013, 56, 2218-2234. 
J. Med. Chem. 2013, 56, 2850-2860. 
J. Med. Chem. 2013, 56, 4320-4342. 
J. Med. Chem. 2013, 56, 4764-4785. 
J. Med. Chem. 2013, 56, 5722-5733. 
J. Med. Chem. 2013, 56, 6413-6433. 
J. Med. Chem. 2013, 56, 7025-7048. 
J. Med. Chem. 2013, 56, 7343-7357. 
J. Med. Chem. 2013, 56, 10045-10065. 
Med. Chem. Comm. 2013, 4, 165-174. 
Med. Chem. Comm. 2013, 4, 663-668. 
Bioorg. Med. Chem. 2014, 22, 194-203. 
Bioorg. Med. Chem. Lett. 2014, 24, 526-531. 
J. Med. Chem. 2014, 57, 970-986. 
J. Med. Chem. 2014, 57, 5419-5434. 
ChEMBL document ID: CHEMBL3301361 for fu and solubility7.4. Plasma protein binding data determined using equilibrium dialysis. Compounds were incubated with whole human plasma at 37°C for >5 hr. The method is described R. E. Fessey, R. P. Austin, P. Barton, A. M. Davis and M. C. Wenlock, in Pharmacokinetic Profiling in Drug Research: Biological, Physicochemical, and Computational Strategies, ed. B. Testa, S. D. Kramer, H. Wunderli-Allenspach, G. Folkers, Wiley-VCH, Weinheim, 2006, The role of plasma protein binding in drug discovery, pp. 119–141. Experimental data ranged from 10% to 99.95% bound. Solubility was determined from solid starting material using the method described in J. Assoc. Lab. Autom. 2011, 16, 276-284. Experimental data ranged from 0.10 to 1500 mM.
